# Supplementary material for: Computational Study of Natural Compounds for the Clearance of Amyloid-Βeta: A Potential Therapeutic Management Strategy for Alzheimer’s Disease
Source: MDPI journal article supplement (doi:10.3390/molecules24183233), 2019-09-05
Supplement: s1 [file s1]

# Computational Study of Natural Compounds for the Clearance of Amyloid-Beta: A Potential Therapeutic Management Strategy for Alzheimer's Disease

Syed Sayeed Ahmad <sup>1</sup>, Haroon Khan <sup>2,\*</sup>, Syed Mohd. Danish Rizvi <sup>3</sup>, Siddique Akber Ansari <sup>4</sup>, Riaz Ullah <sup>5</sup>, Luca Rastrelli <sup>6</sup>, Hafiz Majid Mahmood <sup>7</sup> and Mohd. Haris Siddiqui <sup>1,\*</sup>

<sup>1</sup> Department of Bioengineering, Faculty of Engineering, Integral University, Lucknow, 226026, India

<sup>2</sup> Department of Pharmacy, Abdul Wali Khan University Mardan 23200, Pakistan

<sup>3</sup> Department of Pharmaceutics, College of Pharmacy, University of Hail, PO Box 2440, Ha'il – 81451, Saudi Arabia

<sup>4</sup> Department of Pharmaceutical Chemistry, College of Pharmacy, King Saud University, P.O. Box: 2457, Riyadh, 11451, Saudi Arabia

<sup>5</sup> Medicinal, Aromatic and Poisonous Plants Research Center (MAPRC), College of Pharmacy, King Saud University, PO box 2457, Riyadh 11451, Saudi Arabia

<sup>6</sup> Dipartimento di Farmacia, University of Salerno, 84084 Fisciano, Italy

<sup>7</sup> Department of Pharmacology, College of Pharmacy, King Saud University PO box 2457, Riyadh 11451, Saudi Arabia

\* Correspondence: hkdr2006@gmail.com or haroonkhan@awkum.edu.pk (H.K.); mohdharis.siddiqui@gmail.com (M.H.S.); Tel.: +92-3329123171 (H.K.)

**Table S1.** Human Intestinal Absorption (HIA) value of compounds.

| S.No. | Compound Name | HIA Value |
|-------|---------------|-----------|
| 1.    | Vincamine     | 95.95%    |
| 2.    | Ajmalicine    | 93.31%    |
| 3.    | Emetine       | 96.59%    |
| 4.    | Curcumin      | 94.40%    |
